# Supplementary material for: Biomarker-based score for predicting in-hospital mortality of children admitted to the intensive care unit
Source: HighWire-hosted journal article supplement (doi:10.1136/jim-2021-001855), 2021-07-05
Supplement: jim-2021-001855supp001_data_supplement.pdf [file jim-2021-001855supp001_data_supplement.pdf]

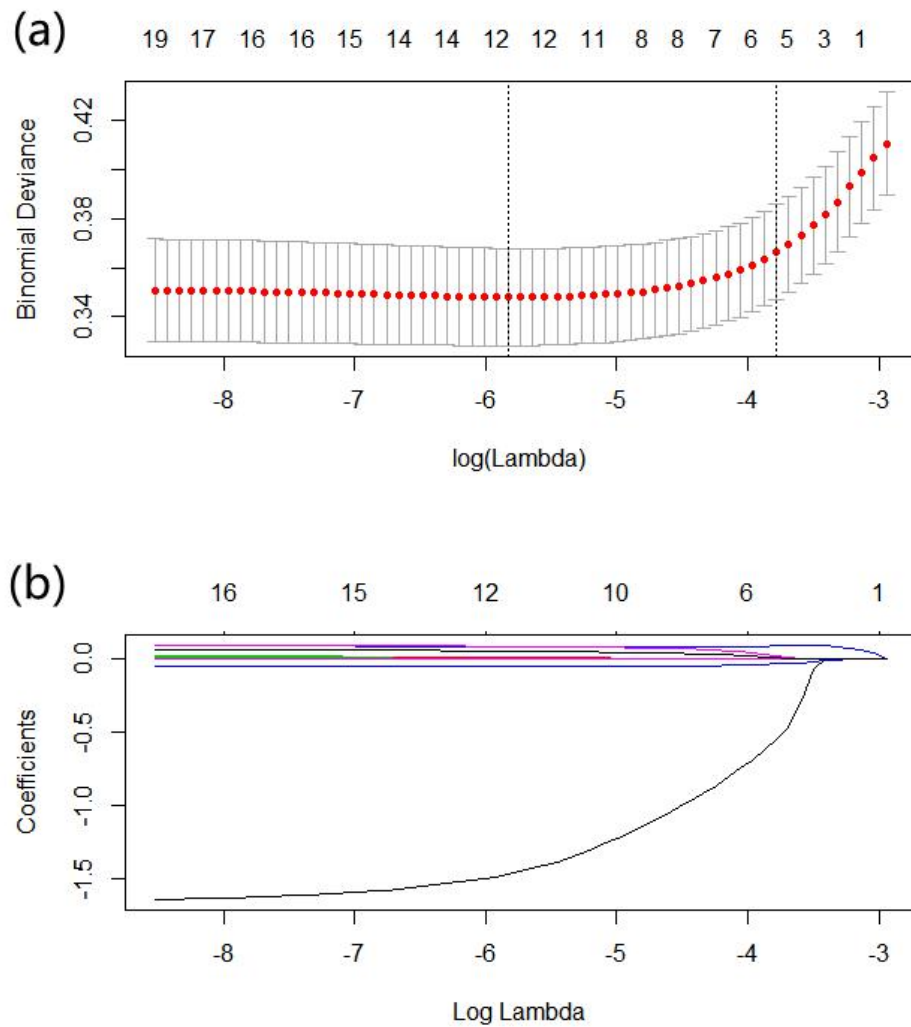

**Supplemental Figure 1.** Predictors' selection for in-hospital mortality using the LASSO-regression method. (a). A 10-fold cross-validation was used in the LASSO-regression; (b). LASSO coefficient profiles of 19 potential variables. A coefficient profile plot was produced against the log (lambda) sequence.

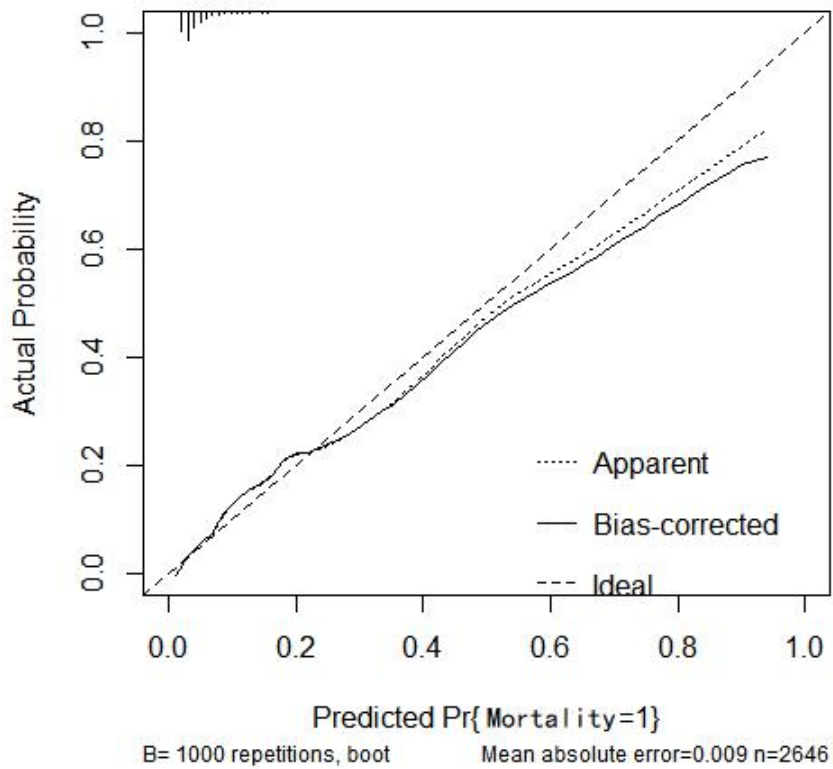

**Supplemental Figure 2.** Calibration curve for the predictive model in the validating set.

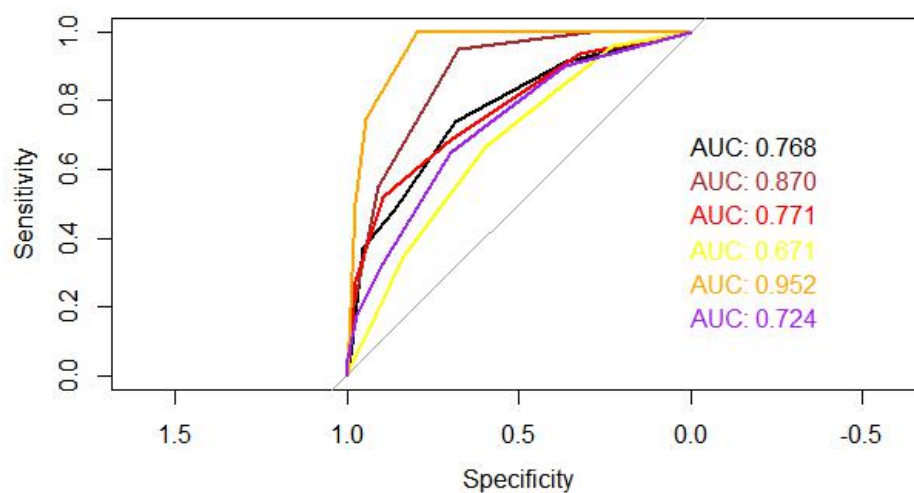

**Supplemental Figure 3.** Comparison of ROC of the new score in predicting in-hospital

mortality in different population with different diagnoses. ( black, diseases of the circulatory system; brown, diseases of the digestive system; red, diseases of the nervous system; yellow, the respiratory system; orange, diseases of the genitourinary system; purple, neoplasms)

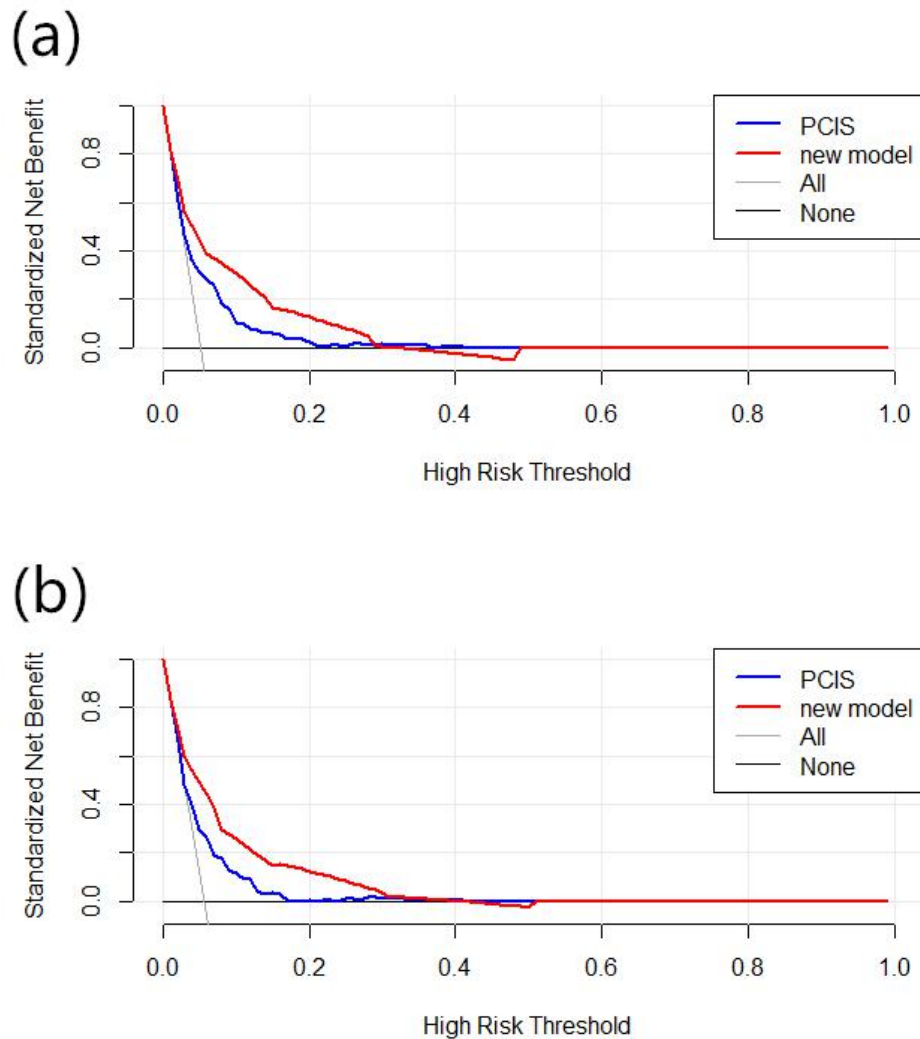

**Supplemental Figure 4.** Comparison of DCA of the new score and the Pediatric Critical Illness Score in predicting in-hospital mortality in (a).the training set and (b).the validating set.
